# Supplementary material for: Research progress and future directions on intraductal papillary mucinous neoplasm: A bibliometric and visualized analysis of over 30 years of research
Source: PubMed Central journal article supplement (PMC10101262; doi:10.1097/md.0000000000033568), 2023-04-14

**Figure S2.** Intraductal papillary mucinous neoplasm research status of multicenter studies by nation

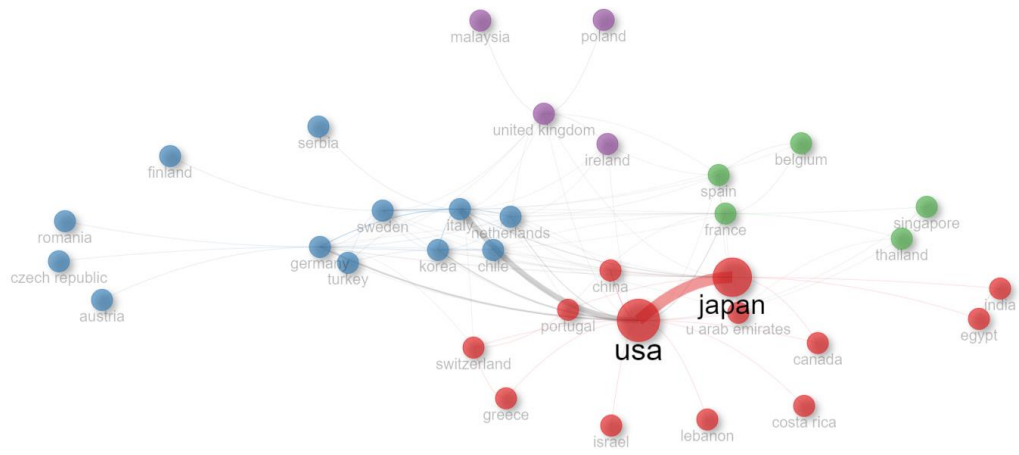

Supplement: medi-102-e33568-s002.pdf [file medi-102-e33568-s002.pdf]
