# Supplementary material for: Research progress and future directions on intraductal papillary mucinous neoplasm: A bibliometric and visualized analysis of over 30 years of research
Source: PubMed Central journal article supplement (PMC10101262; doi:10.1097/md.0000000000033568), 2023-04-14
Supplement: medi-102-e33568-s005.pdf [file medi-102-e33568-s005.pdf]

Table S1. List of keywords of all articles generated by VOSviewer.

| Keyword                              | Cluster | Links | Total link strength | Occurrences | Average published year |
|--------------------------------------|---------|-------|---------------------|-------------|------------------------|
| pancreas                             | 1       | 129   | 1689                | 228         | 2011.6842              |
| carcinoma                            | 1       | 128   | 1440                | 199         | 2010.0854              |
| cancer                               | 1       | 120   | 1177                | 180         | 2012.2167              |
| adenocarcinoma                       | 1       | 118   | 878                 | 123         | 2009.5122              |
| neoplasm                             | 1       | 108   | 607                 | 105         | 2004.6476              |
| expression                           | 1       | 100   | 602                 | 89          | 2011.0674              |
| k-ras                                | 1       | 96    | 548                 | 82          | 2007.3659              |
| ductal adenocarcinoma                | 1       | 98    | 515                 | 73          | 2012.726               |
| intraepithelial neoplasia            | 1       | 94    | 420                 | 56          | 2011.0893              |
| intraductal papillary mucinous tumor | 1       | 87    | 346                 | 51          | 2003.5686              |
| p53                                  | 1       | 74    | 327                 | 46          | 2004.4783              |
| progression                          | 1       | 86    | 320                 | 46          | 2013.7174              |
| mutation                             | 1       | 75    | 296                 | 45          | 2009.7333              |
| ductal ectasia                       | 1       | 64    | 268                 | 41          | 2001.4634              |
| immunohistochemistry                 | 1       | 72    | 212                 | 33          | 2008.9394              |
| cystic tumor                         | 1       | 80    | 231                 | 32          | 2004.375               |
| differentiation                      | 1       | 77    | 247                 | 32          | 2009.4688              |
| invasive carcinoma                   | 1       | 87    | 270                 | 31          | 2012.6129              |
| k-ras mutation                       | 1       | 83    | 229                 | 31          | 2006.7742              |
| gene                                 | 1       | 51    | 163                 | 27          | 2010.5185              |
| hypersecreting neoplasm              | 1       | 49    | 161                 | 24          | 2001.2083              |
| gene-expression                      | 1       | 48    | 147                 | 23          | 2008.8696              |
| juice                                | 1       | 63    | 172                 | 22          | 2007.2273              |
| cystadenocarcinoma                   | 1       | 45    | 155                 | 21          | 2001.6667              |
| carcinogenesis                       | 1       | 55    | 140                 | 20          | 2010.95                |
| cytology                             | 1       | 61    | 156                 | 20          | 2012.25                |
| pathway                              | 1       | 56    | 132                 | 19          | 2012.3158              |
| cystadenoma                          | 1       | 43    | 122                 | 17          | 2002.9412              |
| protein                              | 1       | 47    | 112                 | 17          | 2007.9412              |
| distinct                             | 1       | 57    | 123                 | 15          | 2015.3333              |
| breast-cancer                        | 1       | 41    | 67                  | 12          | 2011.1667              |
| clinicopathological entity           | 1       | 42    | 92                  | 12          | 2002.6667              |
| colorectal-cancer                    | 1       | 42    | 69                  | 12          | 2012.1667              |
| gene-mutation                        | 1       | 46    | 99                  | 12          | 2007.6667              |
| marker                               | 1       | 39    | 64                  | 12          | 2011.75                |
| noncystic carcinoma                  | 1       | 48    | 101                 | 12          | 2007.75                |

|                                      |   |     |      |     |           |
|--------------------------------------|---|-----|------|-----|-----------|
| ras gene-mutation                    | 1 | 48  | 96   | 12  | 2004.5833 |
| cells                                | 1 | 39  | 68   | 11  | 2009.9091 |
| intestinal pathway                   | 1 | 48  | 95   | 11  | 2013.2727 |
| muc2                                 | 1 | 40  | 79   | 11  | 2008.8182 |
| pancreatic intraepithelial neoplasia | 1 | 49  | 93   | 11  | 2011.7273 |
| pancreatic juice                     | 1 | 56  | 96   | 11  | 2010.3636 |
| pancreatic tumor                     | 1 | 50  | 87   | 11  | 2005.7273 |
| point mutation                       | 1 | 43  | 83   | 11  | 2007.3636 |
| entity                               | 1 | 37  | 68   | 10  | 2003.5    |
| immunohistochemical analysis         | 1 | 38  | 68   | 10  | 2005.7    |
| muc1                                 | 1 | 43  | 92   | 10  | 2010.3    |
| muc5ac                               | 1 | 42  | 83   | 10  | 2008.6    |
| mucinous neoplasm                    | 1 | 46  | 74   | 10  | 2012.2    |
| pancreatic carcinoma                 | 1 | 43  | 68   | 10  | 2007.6    |
| tumor                                | 2 | 131 | 2515 | 365 | 2010.6274 |
| diagnosis                            | 2 | 126 | 1113 | 150 | 2010.98   |
| cystic neoplasm                      | 2 | 124 | 1074 | 139 | 2011.6403 |
| clinicopathological features         | 2 | 104 | 803  | 94  | 2009.5319 |
| ct                                   | 2 | 87  | 554  | 70  | 2012.0429 |
| benign                               | 2 | 89  | 504  | 60  | 2011.5833 |
| differential-diagnosis               | 2 | 91  | 452  | 55  | 2008.6909 |
| natural history                      | 2 | 78  | 436  | 51  | 2011.8235 |
| duct                                 | 2 | 81  | 345  | 45  | 2009.8444 |
| mr cholangiopancreatography          | 2 | 76  | 283  | 36  | 2007.8056 |
| endoscopic ultrasonography           | 2 | 81  | 260  | 33  | 2011.0909 |
| endoscopic ultrasound                | 2 | 79  | 296  | 32  | 2012.1875 |
| fine-needle-aspiration               | 2 | 77  | 243  | 29  | 2013.7241 |
| term-follow-up                       | 2 | 85  | 254  | 29  | 2013.4483 |
| pancreatic neoplasm                  | 2 | 81  | 207  | 26  | 2009.6538 |
| branch duct                          | 2 | 64  | 234  | 25  | 2013.64   |
| ultrasonography                      | 2 | 56  | 159  | 22  | 2009.7273 |
| cystic lesions                       | 2 | 58  | 136  | 20  | 2011.3    |
| peroral pancreatoscopy               | 2 | 58  | 157  | 20  | 2010.8    |
| surgical-management                  | 2 | 63  | 149  | 19  | 2009.7368 |
| predictive factors                   | 2 | 61  | 161  | 18  | 2012.3333 |
| helical ct                           | 2 | 52  | 139  | 17  | 2008.4118 |
| ercp                                 | 2 | 59  | 121  | 16  | 2009.625  |
| extrapancreatic neoplasm             | 2 | 54  | 126  | 16  | 2011.375  |
| branch duct type                     | 2 | 58  | 134  | 15  | 2011.0667 |

|                                         |   |     |      |     |           |
|-----------------------------------------|---|-----|------|-----|-----------|
| updated experience                      | 2 | 55  | 113  | 15  | 2010.4    |
| eus                                     | 2 | 53  | 116  | 14  | 2013.3571 |
| juice cytology                          | 2 | 43  | 99   | 13  | 2013.7692 |
| head resection                          | 2 | 44  | 71   | 12  | 2009.1667 |
| clinical-characteristics                | 2 | 41  | 80   | 11  | 2013.6364 |
| positron-emission-tomography            | 2 | 42  | 80   | 11  | 2012.7273 |
| in-situ                                 | 2 | 45  | 80   | 10  | 2008.7    |
| intraductal papillary mucinous neoplasm | 3 | 131 | 2729 | 398 | 2014      |
| ipmn                                    | 3 | 123 | 936  | 131 | 2012.5115 |
| resection                               | 3 | 107 | 979  | 130 | 2012.3385 |
| classification                          | 3 | 117 | 970  | 127 | 2013.4803 |
| pancreatic cancer                       | 3 | 112 | 662  | 99  | 2013.1919 |
| predictor                               | 3 | 101 | 707  | 87  | 2013.8276 |
| prognosis                               | 3 | 104 | 669  | 87  | 2011.2874 |
| survival                                | 3 | 101 | 629  | 85  | 2012.0471 |
| surgical resection                      | 3 | 100 | 595  | 76  | 2010.3684 |
| follow-up                               | 3 | 106 | 668  | 75  | 2013.68   |
| consensus                               | 3 | 91  | 481  | 62  | 2012.9032 |
| lesions                                 | 3 | 92  | 381  | 55  | 2013.2545 |
| recurrence                              | 3 | 76  | 388  | 48  | 2013.625  |
| experience                              | 3 | 75  | 310  | 38  | 2013.7895 |
| pancreatic ductal adenocarcinoma        | 3 | 80  | 295  | 37  | 2015.1892 |
| outcome                                 | 3 | 68  | 258  | 34  | 2012.8235 |
| cysts                                   | 3 | 71  | 196  | 28  | 2015.3214 |
| pancreatectomy                          | 3 | 60  | 183  | 25  | 2013.32   |
| surgery                                 | 3 | 70  | 166  | 22  | 2012.5909 |
| concomitant                             | 3 | 57  | 185  | 21  | 2014.2857 |
| prevalence                              | 3 | 54  | 158  | 21  | 2014.8095 |
| risk factor                             | 3 | 59  | 155  | 21  | 2015.1429 |
| consensus guideline                     | 3 | 63  | 142  | 20  | 2016.8    |
| remnant pancreas                        | 3 | 65  | 165  | 19  | 2016.5789 |
| biomarker                               | 3 | 41  | 96   | 15  | 2016.8667 |
| ductal carcinoma                        | 3 | 61  | 130  | 15  | 2011.2    |
| pancreaticoduodenectomy                 | 3 | 42  | 89   | 15  | 2013.8    |
| precursor lesions                       | 3 | 47  | 90   | 11  | 2015      |
| gnas                                    | 3 | 34  | 64   | 10  | 2017.7    |
| total pancreatectomy                    | 3 | 43  | 73   | 10  | 2013.9    |
| management                              | 4 | 123 | 2219 | 297 | 2014.2761 |
| malignancy                              | 4 | 121 | 1454 | 171 | 2012.3801 |

|                                   |   |     |      |     |           |
|-----------------------------------|---|-----|------|-----|-----------|
| international consensus guideline | 4 | 112 | 1210 | 152 | 2016.1645 |
| features                          | 4 | 92  | 496  | 74  | 2010.5811 |
| guideline                         | 4 | 88  | 455  | 57  | 2015.2281 |
| risk                              | 4 | 79  | 383  | 51  | 2015.9412 |
| mural nodule                      | 4 | 77  | 322  | 36  | 2014.6111 |
| carcinoembryonic antigen          | 4 | 53  | 169  | 19  | 2016.8421 |
| mri                               | 4 | 53  | 140  | 17  | 2013.3529 |
| size                              | 4 | 53  | 146  | 16  | 2016.625  |
| surveillance                      | 4 | 58  | 136  | 16  | 2016.8125 |
| validation                        | 4 | 48  | 107  | 15  | 2018.2667 |
| branch duct ipmn                  | 4 | 46  | 131  | 14  | 2016.1429 |
| metaanalysis                      | 4 | 49  | 96   | 13  | 2016.3077 |
| nomogram                          | 4 | 50  | 123  | 13  | 2018.2308 |
| dysplasia                         | 4 | 54  | 111  | 12  | 2016.25   |
| carbohydrate antigen 19-9         | 4 | 38  | 105  | 11  | 2017.3636 |
| subtype                           | 4 | 47  | 89   | 11  | 2013.6364 |
| association                       | 4 | 34  | 60   | 10  | 2013.4    |
| pancreatic resection              | 4 | 47  | 94   | 10  | 2012.6    |
